# Supplementary material
Source: ML conference proceedings conference paper supplement (https://aclanthology.org/P18-1130)
Supplement: Notes [file appendix.pdf › appendix.pdf]

## Appendix: Stack-Pointer Network for Dependency Parsing

### Appendix A: Hyper-Parameters

Table 5 summarizes the chosen hyper-parameters used for all the experiments in this paper. Some parameters are chosen directly or similarly from those reported in [Dozat and Manning \(2017\)](#). We use the same hyper-parameters across the models on different treebanks and languages, due to time constraints.

| Layer    | Hyper-parameter       | Value      |
|----------|-----------------------|------------|
| CNN      | window size           | 3          |
|          | number of filters     | 50         |
| LSTM     | encoder layers        | 3          |
|          | encoder size          | 512        |
|          | decoder layers        | 1          |
|          | decoder size          | 512        |
| MLP      | arc MLP size          | 512        |
|          | label MLP size        | 128        |
| Dropout  | embeddings            | 0.33       |
|          | LSTM hidden states    | 0.33       |
|          | LSTM layers           | 0.33       |
| Learning | optimizer             | Adam       |
|          | initial learning rate | 0.001      |
|          | $(\beta_1, \beta_2)$  | (0.9, 0.9) |
|          | decay rate            | 0.75       |
|          | gradient clipping     | 5.0        |

Table 5: Hyper-parameters for all experiments.

## Appendix B: UD Treebanks

Table 6 shows the corpora statistics of the treebanks for 12 languages. For evaluation, we report results excluding punctuation, which is any tokens with POS tags “PUNCT” or “SYM”.

|           | Corpora                     |          | <i>#Sent</i> | <i>#Token (w.o punct)</i> |
|-----------|-----------------------------|----------|--------------|---------------------------|
| Bulgarian | BTB                         | Training | 8,907        | 124,336 (106,813)         |
|           |                             | Dev      | 1,115        | 16,089 (13,822)           |
|           |                             | Test     | 1,116        | 15,724 (13,456)           |
| Catalan   | AnCora                      | Training | 13,123       | 417,587 (371,981)         |
|           |                             | Dev      | 1,709        | 56,482 (50,452)           |
|           |                             | Test     | 1,846        | 57,738 (51,324)           |
| Czech     | PDT, CAC<br>CLTT<br>FicTree | Training | 102,993      | 1,806,230 (1,542,805)     |
|           |                             | Dev      | 11,311       | 191,679 (163,387)         |
|           |                             | Test     | 12,203       | 205,597 (174,771)         |
| Dutch     | Alpino<br>LassySmall        | Training | 18,310       | 267,289 (234,104)         |
|           |                             | Dev      | 1,518        | 22,091 (19,042)           |
|           |                             | Test     | 1,396        | 21,126 (18,310)           |
| English   | EWT                         | Training | 12,543       | 204,585 (180,308)         |
|           |                             | Dev      | 2,002        | 25,148 (21,998)           |
|           |                             | Test     | 2,077        | 25,096 (21,898)           |
| French    | GSD                         | Training | 14,554       | 356,638 (316,780)         |
|           |                             | Dev      | 1,478        | 35,768 (31,896)           |
|           |                             | Test     | 416          | 10,020 (8,795)            |
| German    | GSD                         | Training | 13,841       | 263,536 (229,204)         |
|           |                             | Dev      | 799          | 12,348 (10,727)           |
|           |                             | Test     | 977          | 16,268 (13,929)           |
| Italian   | ISDT                        | Training | 12,838       | 270,703 (239,836)         |
|           |                             | Dev      | 564          | 11,908 (10,490)           |
|           |                             | Test     | 482          | 10,417 (9,237)            |
| Norwegian | Bokmaal<br>Nynorsk          | Training | 29,870       | 48,9217 (43,2597)         |
|           |                             | Dev      | 4,300        | 67,619 (59,784)           |
|           |                             | Test     | 3,450        | 54,739 (48,588)           |
| Romanian  | RRT                         | Training | 8,043        | 185,113 (161,429)         |
|           |                             | Dev      | 752          | 17,074 (14,851)           |
|           |                             | Test     | 729          | 16,324 (14,241)           |
| Russian   | SynTagRus                   | Training | 48,814       | 870,034 (711,184)         |
|           |                             | Dev      | 6,584        | 118,426 (95,676)          |
|           |                             | Test     | 6,491        | 117,276 (95,745)          |
| Spanish   | GSD<br>AnCora               | Training | 28,492       | 827,053 (730,062)         |
|           |                             | Dev      | 4,300        | 89,487 (78,951)           |
|           |                             | Test     | 2,174        | 64,617 (56,973)           |

Table 6: Corpora statistics of UD Treebanks for 12 languages. *#Sent* and *#Token* refer to the number of sentences and the number of words (w./w.o punctuations) in each data set, respectively.

## Appendix C: Main Results

Table 7 illustrates the details of the experimental results. For each STACKPRT parsing model, we ran experiments with decoding beam size equals to 1, 5, and 10. For each experiment, we report the mean values with corresponding standard deviations over 5 runs.

| Model | beam | English           |                   |                   |                   |                   |                   |                   |                   |
|-------|------|-------------------|-------------------|-------------------|-------------------|-------------------|-------------------|-------------------|-------------------|
|       |      | Dev               |                   |                   |                   | Test              |                   |                   |                   |
|       |      | UAS               | LAS               | UCM               | LCM               | UAS               | LAS               | UCM               | LCM               |
| BiAF  | –    | 95.73±0.04        | <b>93.97±0.06</b> | 60.58±0.77        | 47.47±0.63        | 95.84±0.06        | <b>94.21±0.04</b> | 59.49±0.23        | 49.07±0.34        |
| Basic | 1    | 95.71±0.02        | 93.88±0.03        | 62.33±0.33        | 47.75±0.32        | 95.71±0.06        | 94.07±0.06        | 60.91±0.35        | 49.54±0.48        |
|       | 5    | 95.71±0.04        | 93.88±0.05        | 62.40±0.45        | 47.80±0.44        | 95.76±0.11        | 94.12±0.11        | 61.09±0.43        | 49.67±0.41        |
|       | 10   | 95.72±0.03        | 93.89±0.04        | <b>62.40±0.45</b> | <b>47.80±0.44</b> | 95.77±0.11        | 94.12±0.11        | 61.09±0.43        | 49.67±0.41        |
| +gpar | 1    | 95.68±0.04        | 93.82±0.02        | 61.82±0.36        | 47.32±0.14        | 95.73±0.04        | 94.07±0.05        | 60.99±0.46        | 49.83±0.59        |
|       | 5    | 95.67±0.01        | 93.83±0.02        | 61.93±0.32        | 47.44±0.20        | 95.76±0.06        | 94.11±0.06        | 61.23±0.47        | 50.07±0.59        |
|       | 10   | 95.69±0.02        | 93.83±0.02        | 61.95±0.32        | 47.44±0.20        | 95.78±0.05        | 94.12±0.06        | 61.24±0.46        | <b>50.07±0.59</b> |
| +sib  | 1    | 95.75±0.03        | 93.93±0.04        | 61.93±0.49        | 47.66±0.48        | 95.77±0.15        | 94.11±0.06        | 61.32±0.37        | 49.75±0.29        |
|       | 5    | 95.74±0.02        | 93.93±0.05        | 62.16±0.22        | 47.68±0.54        | 95.84±0.09        | 94.17±0.09        | 61.52±0.57        | 49.91±0.76        |
|       | 10   | 95.75±0.02        | 93.94±0.06        | 62.17±0.20        | 47.68±0.54        | 95.85±0.10        | 94.18±0.09        | <b>61.52±0.57</b> | 49.91±0.76        |
| Full  | 1    | 95.63±0.08        | 93.78±0.08        | 61.56±0.63        | 47.12±0.36        | 95.79±0.06        | 94.11±0.06        | 61.02±0.31        | 49.45±0.23        |
|       | 5    | 95.75±0.06        | 93.90±0.08        | 62.06±0.42        | 47.43±0.36        | 95.87±0.04        | 94.20±0.03        | 61.43±0.49        | 49.68±0.47        |
|       | 10   | <b>95.75±0.06</b> | 93.90±0.08        | 62.08±0.39        | 47.43±0.36        | <b>95.87±0.04</b> | 94.19±0.04        | 61.43±0.49        | 49.68±0.47        |
| Model | beam | Chinese           |                   |                   |                   |                   |                   |                   |                   |
|       |      | Dev               |                   |                   |                   | Test              |                   |                   |                   |
|       |      | UAS               | LAS               | UCM               | LCM               | UAS               | LAS               | UCM               | LCM               |
| BiAF  | –    | 90.20±0.17        | 88.94±0.13        | 43.41±0.83        | 38.42±0.79        | 90.43±0.08        | 89.14±0.09        | 42.92±0.29        | 38.68±0.25        |
| Basic | 1    | 89.76±0.32        | 88.44±0.28        | 45.18±0.80        | 40.13±0.63        | 90.04±0.32        | 88.74±0.40        | 45.00±0.47        | 40.12±0.42        |
|       | 5    | 89.97±0.13        | 88.67±0.14        | 45.33±0.58        | 40.25±0.65        | 90.46±0.15        | 89.17±0.18        | 45.41±0.48        | 40.53±0.48        |
|       | 10   | 89.97±0.14        | 88.68±0.14        | 45.33±0.58        | 40.25±0.65        | 90.48±0.11        | 89.19±0.15        | 45.44±0.44        | 40.56±0.43        |
| +gpar | 1    | 90.05±0.14        | 88.71±0.16        | 45.63±0.52        | 40.45±0.61        | 90.28±0.10        | 88.96±0.10        | 45.26±0.59        | 40.38±0.43        |
|       | 5    | 90.17±0.14        | 88.85±0.13        | 46.03±0.53        | 40.69±0.55        | 90.45±0.15        | 89.14±0.14        | 45.71±0.46        | 40.80±0.26        |
|       | 10   | 90.18±0.16        | 88.87±0.14        | <b>46.05±0.58</b> | 40.69±0.55        | 90.46±0.16        | 89.16±0.15        | 45.71±0.46        | 40.80±0.26        |
| +sib  | 1    | 89.91±0.07        | 88.59±0.10        | 45.50±0.50        | 40.40±0.48        | 90.25±0.10        | 88.94±0.12        | 45.42±0.52        | 40.54±0.69        |
|       | 5    | 89.99±0.05        | 88.70±0.09        | 45.55±0.36        | 40.37±0.14        | 90.41±0.07        | 89.12±0.07        | 45.76±0.46        | 40.69±0.52        |
|       | 10   | 90.00±0.04        | 88.72±0.09        | 45.58±0.32        | 40.37±0.14        | 90.43±0.09        | 89.15±0.10        | 45.75±0.44        | 40.68±0.50        |
| Full  | 1    | 90.21±0.15        | 88.85±0.15        | 45.83±0.52        | 40.54±0.60        | 90.36±0.16        | 89.05±0.15        | 45.60±0.33        | 40.73±0.23        |
|       | 5    | 90.23±0.13        | 88.89±0.14        | 46.00±0.54        | <b>40.75±0.64</b> | 90.58±0.12        | 89.27±0.11        | <b>46.20±0.26</b> | <b>41.25±0.22</b> |
|       | 10   | <b>90.29±0.13</b> | <b>88.95±0.13</b> | 46.03±0.54        | <b>40.75±0.64</b> | <b>90.59±0.12</b> | <b>89.29±0.11</b> | <b>46.20±0.26</b> | <b>41.25±0.22</b> |
| Model | beam | German            |                   |                   |                   |                   |                   |                   |                   |
|       |      | Dev               |                   |                   |                   | Test              |                   |                   |                   |
|       |      | UAS               | LAS               | UCM               | LCM               | UAS               | LAS               | UCM               | LCM               |
| BiAF  | –    | <b>93.60±0.13</b> | <b>91.96±0.13</b> | 58.79±0.25        | 49.59±0.19        | <b>93.85±0.07</b> | <b>92.32±0.06</b> | 60.60±0.38        | 52.46±0.24        |
| Basic | 1    | 93.35±0.14        | 91.58±0.17        | 59.64±0.78        | 49.75±0.64        | 93.39±0.09        | 91.85±0.09        | 61.08±0.31        | 52.21±0.53        |
|       | 5    | 93.49±0.14        | 91.72±0.16        | 59.99±0.69        | 49.82±0.54        | 93.61±0.09        | 92.07±0.08        | 61.38±0.30        | 52.51±0.43        |
|       | 10   | 93.48±0.14        | 91.71±0.17        | <b>60.02±0.69</b> | 49.84±0.54        | 93.59±0.09        | 92.06±0.08        | 61.38±0.30        | 52.51±0.43        |
| +gpar | 1    | 93.39±0.07        | 91.66±0.13        | 59.59±0.54        | 49.81±0.42        | 93.44±0.07        | 91.91±0.11        | 61.73±0.47        | 52.84±0.48        |
|       | 5    | 93.47±0.09        | 91.75±0.10        | 59.81±0.55        | 50.05±0.39        | 93.68±0.04        | 92.16±0.04        | 62.09±0.44        | 53.13±0.42        |
|       | 10   | 93.48±0.08        | 91.76±0.09        | 59.89±0.59        | 50.09±0.40        | 93.68±0.05        | 92.16±0.03        | 62.10±0.42        | <b>53.14±0.4</b>  |
| +sib  | 1    | 93.43±0.07        | 91.73±0.08        | 59.68±0.25        | 49.93±0.30        | 93.55±0.07        | 92.00±0.08        | 61.90±0.50        | 52.79±0.22        |
|       | 5    | 93.53±0.05        | 91.83±0.07        | 59.95±0.23        | 50.14±0.39        | 93.75±0.09        | 92.20±0.08        | 62.21±0.38        | 53.03±0.18        |
|       | 10   | 93.55±0.06        | 91.84±0.07        | 59.96±0.24        | <b>50.15±0.40</b> | 93.76±0.09        | 92.21±0.08        | <b>62.21±0.38</b> | 53.03±0.18        |
| Full  | 1    | 93.33±0.13        | 91.60±0.16        | 59.78±0.32        | 49.78±0.29        | 93.50±0.04        | 91.91±0.11        | 61.80±0.28        | 52.95±0.37        |
|       | 5    | 93.42±0.11        | 91.69±0.12        | 59.90±0.27        | 49.94±0.35        | 93.64±0.03        | 92.10±0.06        | 61.89±0.21        | 53.06±0.36        |
|       | 10   | 93.40±0.11        | 91.67±0.12        | 59.90±0.27        | 49.94±0.35        | 93.64±0.03        | 92.11±0.05        | 61.89±0.21        | 53.06±0.36        |

Table 7: Parsing performance of different variations of our model on both the development and test sets for three languages, together with the BiAF parser as the baseline. Best results are highlighted with bold print.
